# Supplementary material for: Prognostic and immunological potential of PPM1G in hepatocellular carcinoma
Source: publisher site journal article supplement (doi:10.18632/aging.202964), 2021-05-05
Supplement: Supplementary file [file aging-v13i9-202964-supplementary-material-SD1.pdf]

**SUPPLEMENTARY FIGURES**

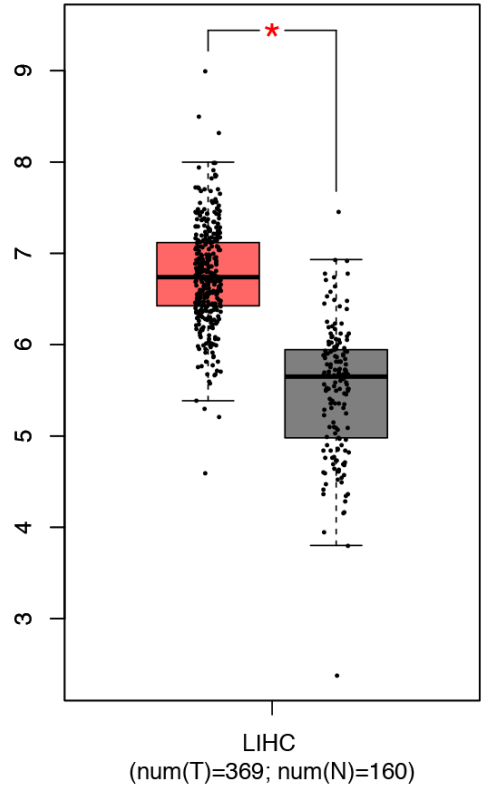

**Supplementary Figure 1. CCT7 expression in LIHC (GEPIA).** The box plots represent CCT7 mRNA expression in LIHC (red plot) and normal (blue plot) tissues.

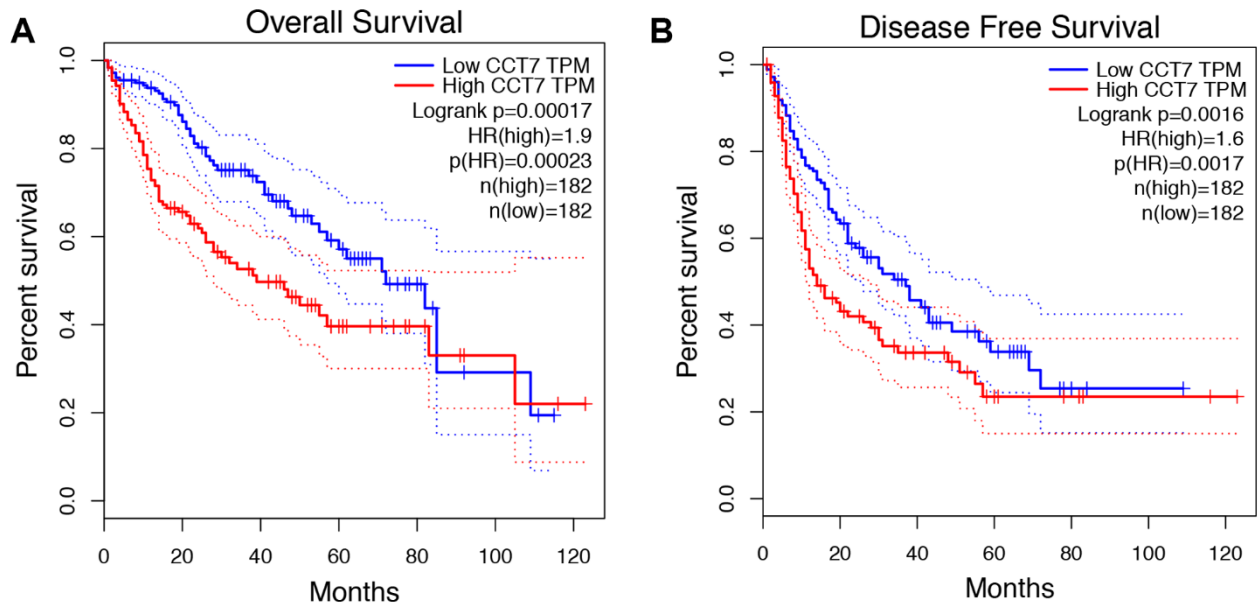

**Supplementary Figure 2. Association between survival and CCT7 expression level in LIHC (GEPIA).** The survival curves demonstrate the survival of patients with high (red) and low (blue) CCT7 expression in LIHC. (A) Overall survival (OS). (B) disease-free survival (DFS).

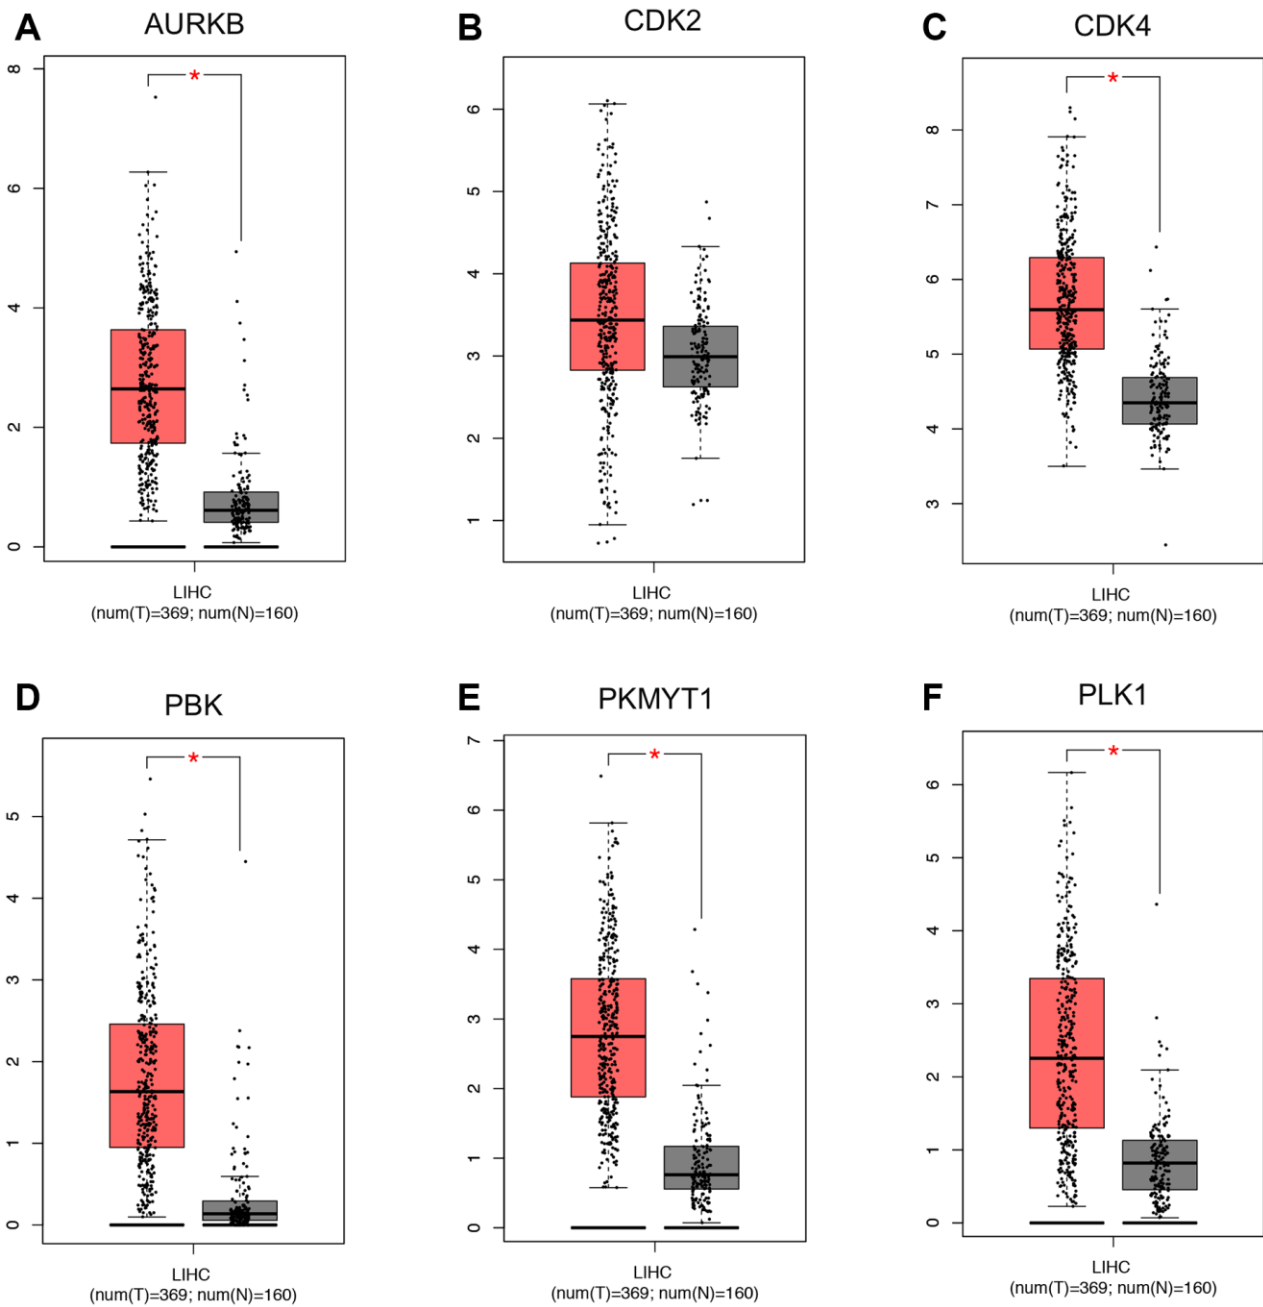

**Supplementary Figure 3. Expression level of kinase genes related to PPM1G in LIHC (GEPIA).** The box plots show the mRNA expression of kinase genes: (A) AURKB, (B) CDK2, (C) CDK4, (D) PBK, (E) PKMYT1 and (F) PLK1 in LIHC (red plot) and normal (blue plot) tissues.

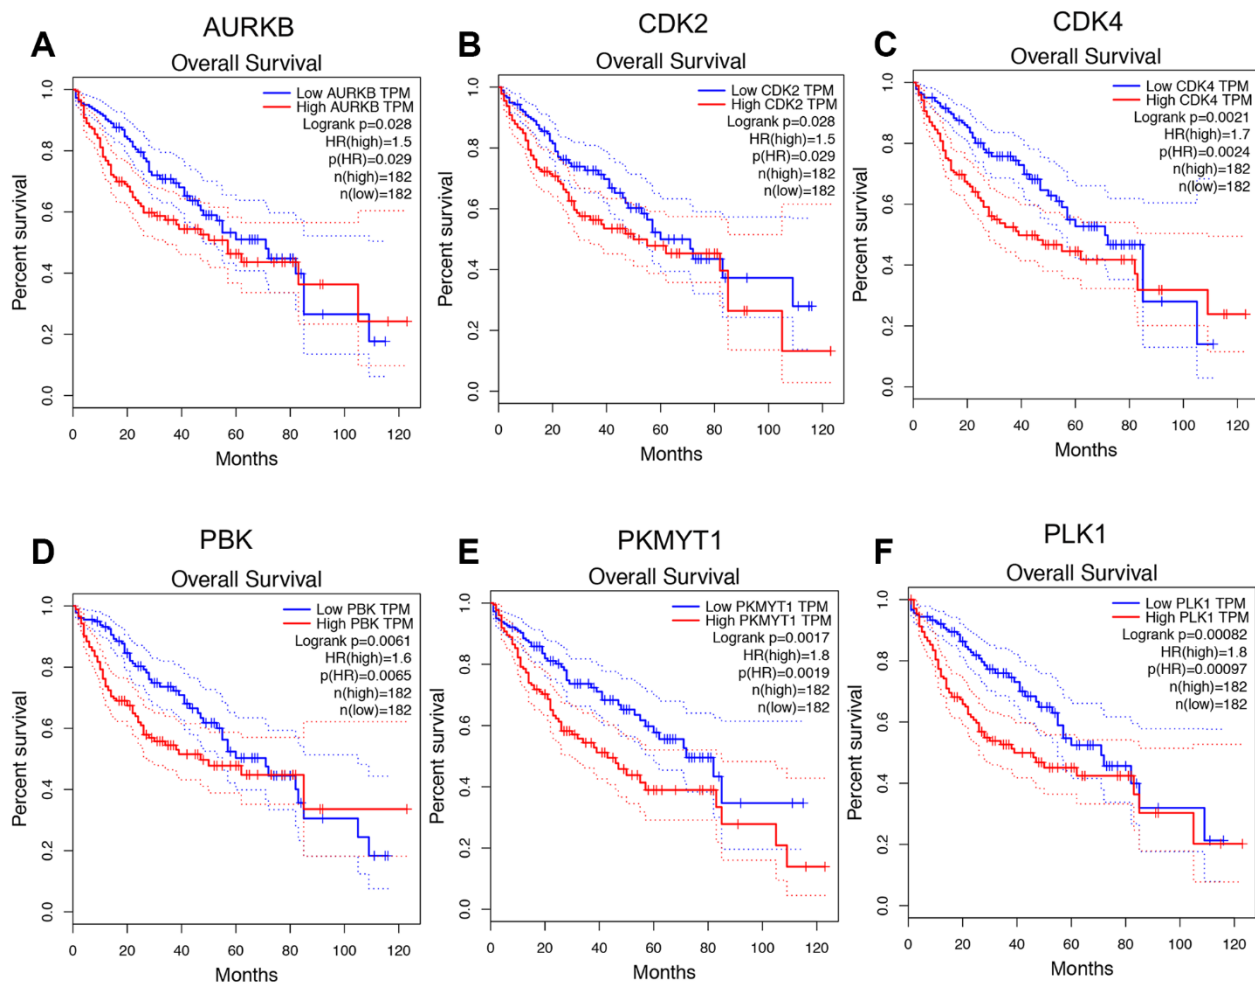

**Supplementary Figure 4. Association between OS and the expression of kinase genes related to PPM1G in LIHC (GEPIA).** The survival curves demonstrate the survival of patients with high (red) and low (blue) expression of PPM1G-related kinase genes: (A) AURKB, (B) CDK2, (C) CDK4, (D) PBK, (E) PKMYT1 and (F) PLK1 in LIHC.
